# Supplementary material for: Fe–N–C single-atom nanozymes with peroxidase-like activity for the detection of alkaline phosphatase
Source: Royal Society of Chemistry journal article supplement (doi:10.1039/d0an01846e), 2020-11-13
Supplement: d0an01846e1.pdf [file d0an01846e1.pdf]

1  
2  
3  
4  
5  
6  
7  
8  
9  
10  
11  
12  
13  
14  
15  
16  
17  
18  
19  
20  
21

## Supporting information

### **Fe-N-C single-atom nanozymes with peroxidase-like activity for the detection of alkaline phosphatase**

Xiaolei Xie<sup>a</sup>, Yufei Wang<sup>b</sup>, Xiaobin Zhou<sup>a</sup>, Junyang Chen<sup>a</sup>, Mengke Wang<sup>a</sup>, Xingguang Su<sup>a\*</sup>

<sup>a</sup> *College of Chemistry, Jilin University, Changchun, 130012, PR China*

<sup>b</sup> *State Key Laboratory of Inorganic Synthesis and Preparative Chemistry, Jilin University,*

*Changchun 130012, PR China*

\*Corresponding author

*Tel.:* +86-431-85168352

*E-mail address:* [suxg@jlu.edu.cn](mailto:suxg@jlu.edu.cn) (X. Su).

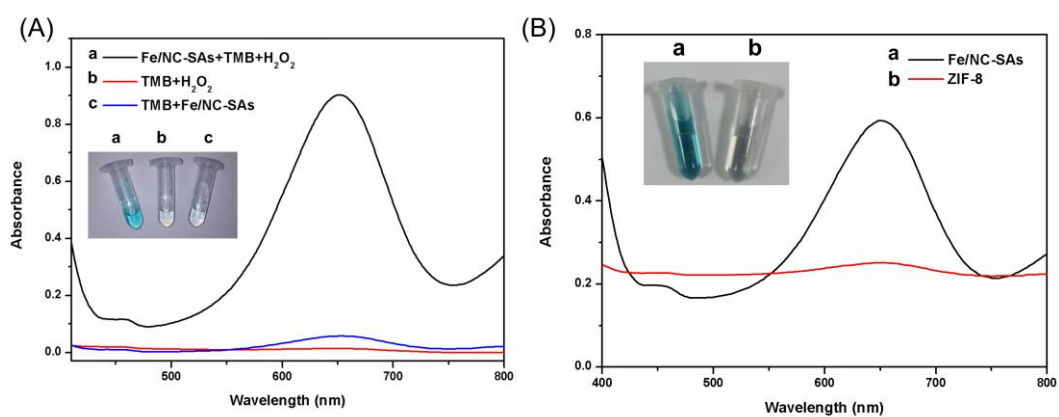

1

2 **Fig. S1.** UV-vis absorption spectra of peroxidase-like activity of Fe/NC-SAs system with

3 substrates of TMB. Inset was the corresponding photos under visible light.

4

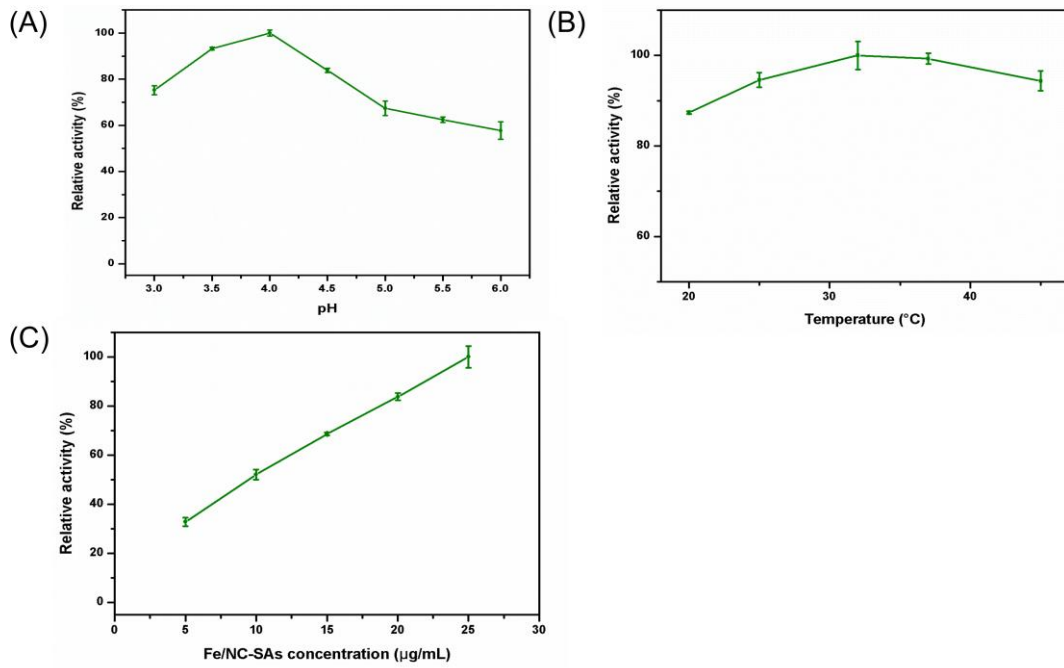

1

2 **Fig. S2.** Influence of pH (A), reaction temperature (B), concentrations of Fe/NC-SAs(C) on the

3 activity of Fe/NC-SAs in TMB+H<sub>2</sub>O<sub>2</sub>/Fe/NC-SAs system.

4

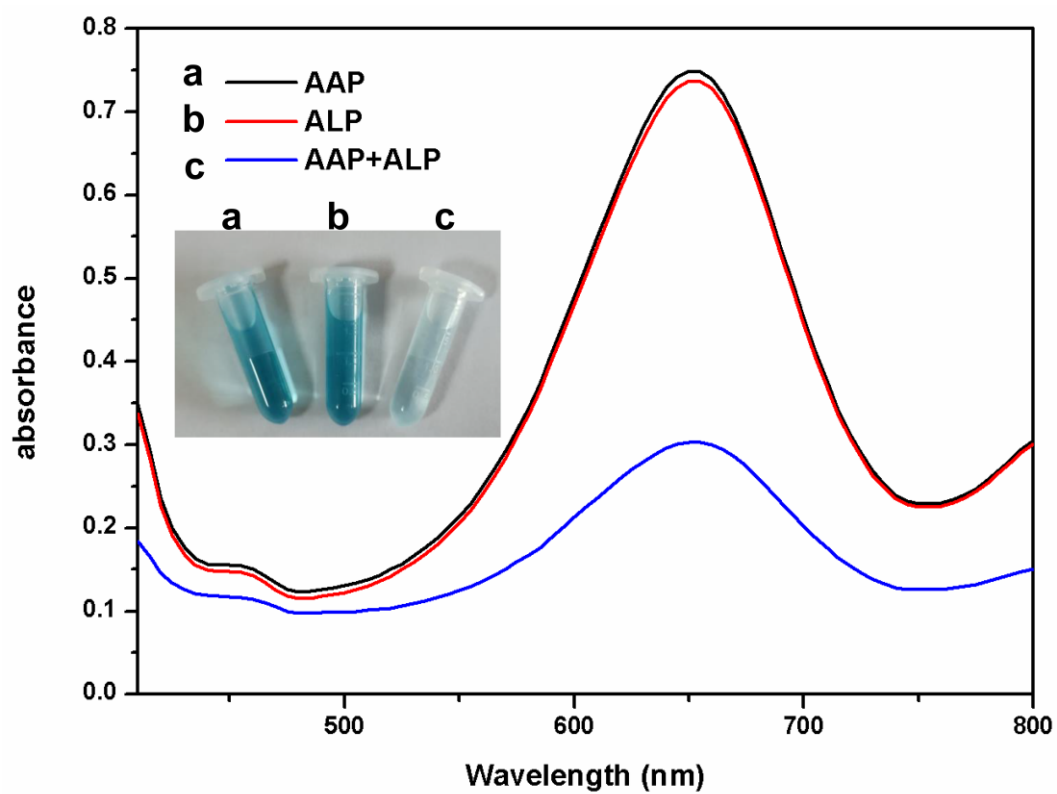

1

2 **Fig. S3.** UV-vis absorption spectra of ALP detection system based on Fe/NC-SAs. Inset was the  
3 corresponding photos under visible light.

4

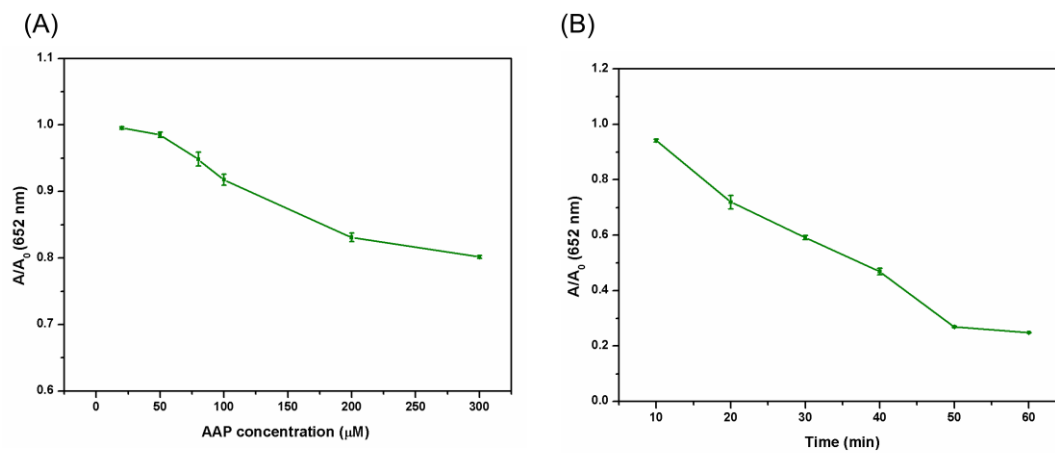

1

2 **Fig. S4.** Influence of concentrations of AAP (A), reaction time (B) on the relative absorbance

3 ( $A/A_0$ ) of ALP detection system based on Fe/NC-SAs. A was the sample absorbance and  $A_0$  were

4 the absorbance at zero concentration (A) and initial time (B).

5

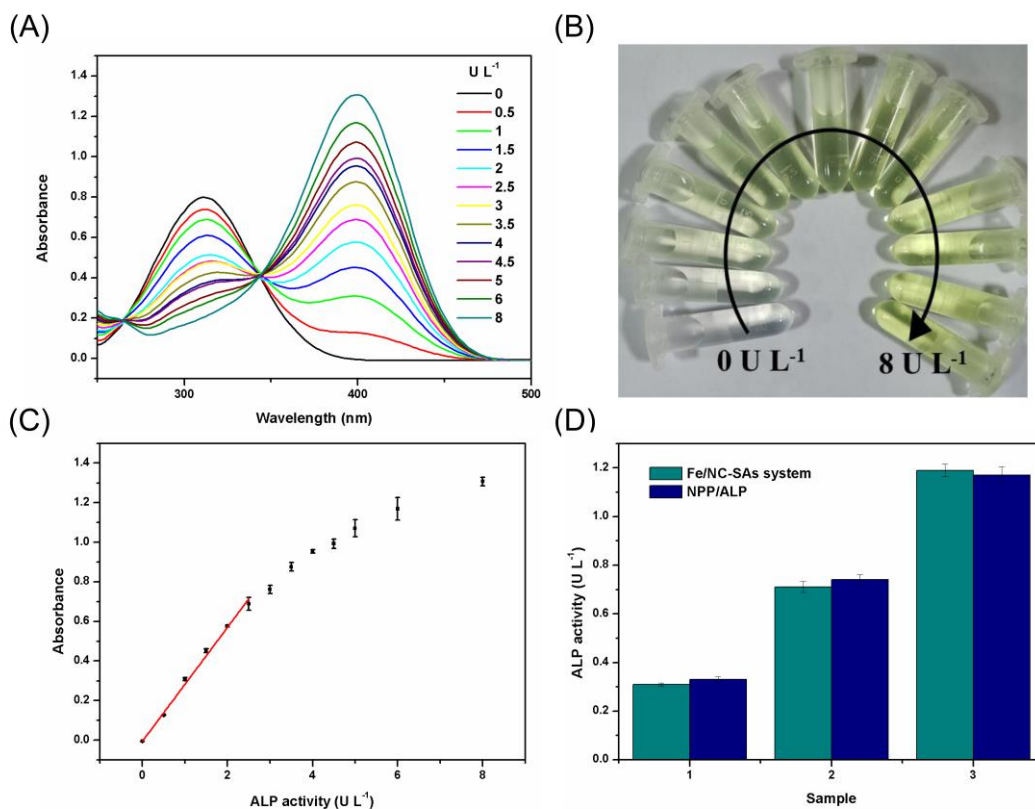

1

2 **Fig. S5.** (A) UV-vis absorption spectra of pNPP with varied amounts of ALP addition. The  
 3 concentration pNPP was 1 mM and reaction time was 50 minutes. (B) Photographs of the  
 4 pNPP/ALP enzymatic reaction solutions with various concentrations of ALP taken under the  
 5 visible light. (C) Plots of the absorbance of the assay based on pNPP/ALP versus ALP activity at  
 6 405 nm. (D) The measured results of pNPP/ALP were compared with that obtained by Fe/NC-SAs  
 7 system.

1 **Table S1** Comparison of several previously reported ALP sensors

| Biosensing materials                | Analytical method | Linear range (U L <sup>-1</sup> ) | LOD (U L <sup>-1</sup> ) | Reference |
|-------------------------------------|-------------------|-----------------------------------|--------------------------|-----------|
| Cu(BCDS) <sub>2</sub> <sup>2-</sup> | Fluorescent       | 0-220                             | 0.27                     | 1         |
| Carbon quantum dots                 | Fluorescent       | 16.7-782.6                        | 1.1                      | 2         |
| PB NCs                              | Colorimetry       | 0.6-6                             | 0.23                     | 3         |
| Ce(IV) ions                         | Colorimetry       | 50-250                            | 2.3                      | 4         |
| MnFe <sub>2</sub> O <sub>4</sub>    | Colorimetry       | 0.6-55                            | 0.27                     | 5         |
| FeCo NPs                            | Colorimetry       | 0.6-10                            | 0.49                     | 6         |
| Fe/NC-SAs                           | Colorimetry       | 0.1-1.5                           | 0.05                     | This work |

2

3

## 1   **References**

- 2   1.     Y. Mei, Q. Hu, B. Zhou, Y. Zhang, M. He, T. Xu, F. Li and J. Kong, *Talanta*, 2018, **176**,
- 3         52-58.
- 4   2.     G. Liu, J. Zhao, S. Wang, S. Lu, J. Sun and X. Yang, *Sensors and Actuators B:*
- 5         *Chemical*, 2020, **306**, 127583.
- 6   3.     T. Wu, W. Hou, Z. Ma, M. Liu, X. Liu, Y. Zhang and S. Yao, *Microchimica Acta*, 2019,
- 7         **186**: 123.
- 8   4.     H. Song, H. Wang, X. Li, Y. Peng, J. Pan and X. Niu, *Analytica Chimica Acta*, 2018,
- 9         **1044**, 154-161.
- 10  5.     X. Niu, K. Ye, Z. Li, H. Zhao, L. Wang, J. Pan, H. Song and M. Lan, *Journal of Analysis*
- 11         *and Testing*, 2019, **3**, 228-237.
- 12  6.     T. Wu, Z. Ma, P. Li, M. Liu, X. Liu, H. Li, Y. Zhang and S. Yao, *Talanta*, 2019, **202**,
- 13         354-361.
- 14
